# Supplementary material for: Effects of Stocking Density and Pre-Slaughter Handling on the Fillet Quality of Largemouth Bass (Micropterus salmoides): Implications for Fish Welfare
Source: MDPI journal article supplement (doi:10.3390/foods13101477), 2024-05-10
Supplement: s1 [file s1]

**Table S1.** Three-Way ANOVA p-value table for the data variables.

| Effect of (p-value)→    | Slaughtering<br>method | Stocking<br>density | Storage time | Slaughtering<br>method X<br>Stocking density | Slaughtering<br>method X<br>Storage time | Stocking<br>density X<br>Storage time | Slaughtering method X<br>Stocking density X<br>Storage time |
|-------------------------|------------------------|---------------------|--------------|----------------------------------------------|------------------------------------------|---------------------------------------|-------------------------------------------------------------|
| Variable ↓              |                        |                     |              |                                              |                                          |                                       |                                                             |
| Rigor index             | 7.00E-03               | 1.19E-01            | 5.23E-31     | 3.68E-05                                     | 1.56E-22                                 | 1.90E-16                              | 6.77E-09                                                    |
| pH                      | 4.40E-02               | 1.02E-04            | 1.60E-10     | 4.20E-02                                     | 5.40E-10                                 | 4.94E-04                              | 6.50E-02                                                    |
| Hardness                | 1.25E-04               | 9.00E-06            | 3.85E-04     | 4.81E-04                                     | 3.00E-02                                 | 1.00E-03                              | 1.89E-05                                                    |
| Lipid oxidation (TBARS) | 4.81E-04               | 1.90E-04            | 4.25E-07     | 5.30E-02                                     | 9.81E-04                                 | 4.40E-02                              | 1.53E-01                                                    |

Significance interactions <0.05, <0.01, <0.001, <0.0001 are indicated as the green colour cells.
